# Supplementary material for: Indane Based Molecular Motors: UV-Switching Increases Number of Isomers
Source: MDPI journal article supplement (doi:10.3390/molecules27196716), 2022-10-09

# Supplementary materials

## Indane based molecular motors. UV-switching increases number of isomers.

Valeriy P. Shendrikov <sup>1,2</sup>, Anna S. Alekseeva <sup>1</sup>, Erik F. Kot <sup>1</sup>, Konstantin S. Mineev <sup>1</sup>, Daria S. Tretiakova <sup>1</sup>, Abdulilah Ece <sup>3</sup> and Ivan A. Boldyrev <sup>1,\*</sup>

<sup>1</sup> Shemyakin-Ovchinnikov Institute of Bioorganic, Chemistry of the Russian Academy of Sciences, GSP-7, Ulitsa Miklukho-Maklaya, 16/10, 117997 Moscow, Russia

<sup>2</sup> Higher Chemical College, Mendeleev University of Chemical Technology of Russia, Miuskaya sq. 9, 125047 Moscow, Russia

<sup>3</sup> Department of Pharmaceutical Chemistry, Faculty of Pharmacy, Biruni University, Istanbul 34010, Turkey

\* Correspondence: [ivan@lipids.ibch.ru](mailto:ivan@lipids.ibch.ru); Tel.: +7-495-330-66-10

|                                                           |   |
|-----------------------------------------------------------|---|
| 1. NMR spectra of target and intermediate compounds ..... | 2 |
| 2. Energy barriers of rotation .....                      | 6 |
| 3. Molecular orbitals .....                               | 8 |

## Section S1.

### NMR of target and intermediate compounds

Chemical shifts of 4-aphin, 6-aphin

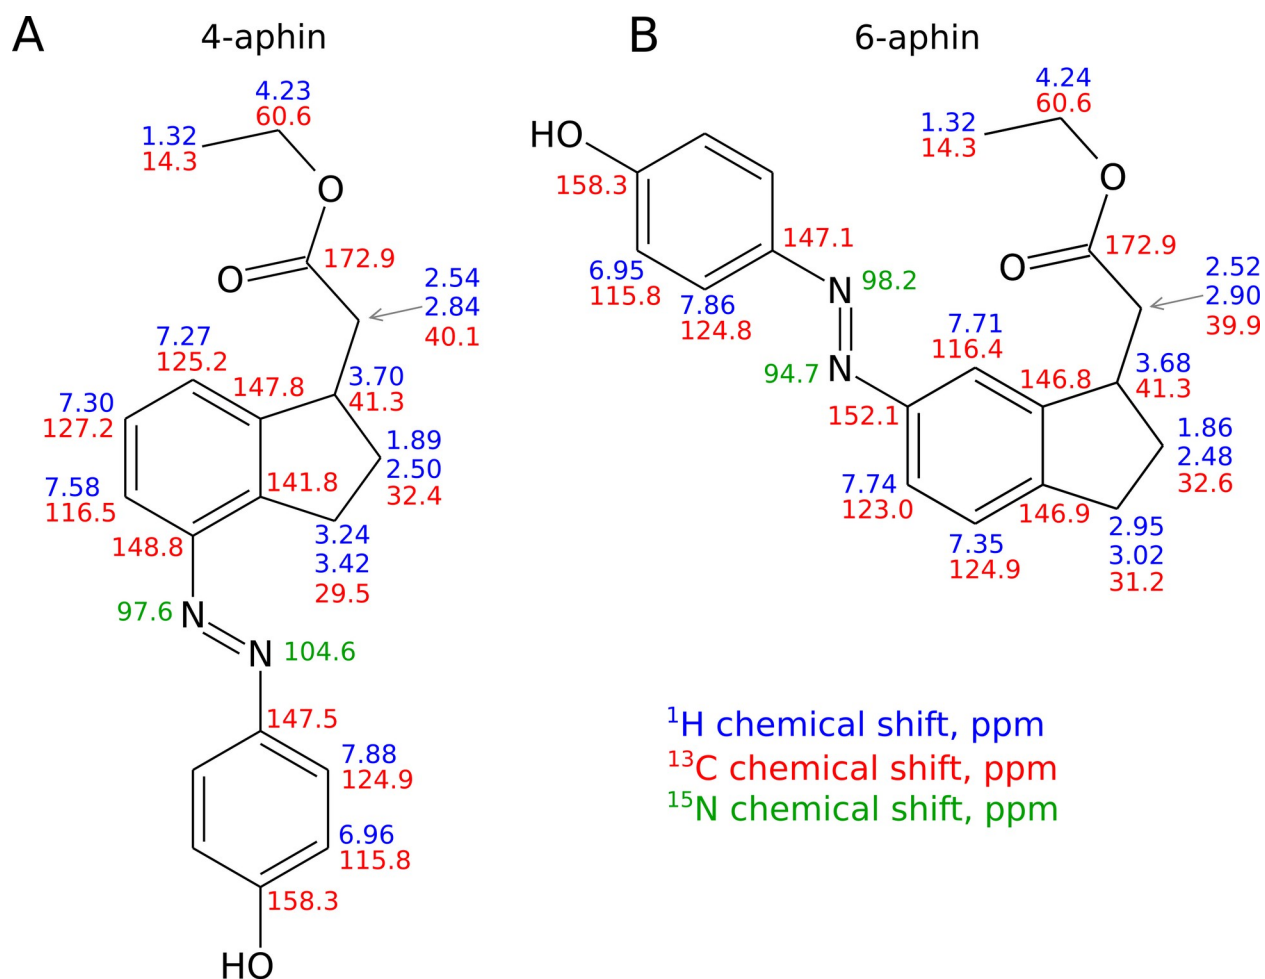

## Chemical shifts of 4-aphin, 6-aphin

### 6-aphin

ethyl 2-{6-[(1E)-2-(4-hydroxyphenyl)diazen-1-yl]-2,3-dihydro-1H-inden-1-yl}acetate

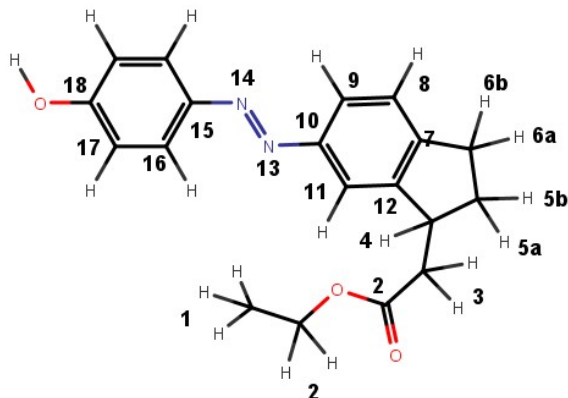

### 4-aphin

ethyl 2-{4-[(1E)-2-(4-hydroxyphenyl)diazen-1-yl]-2,3-dihydro-1H-inden-1-yl}acetate

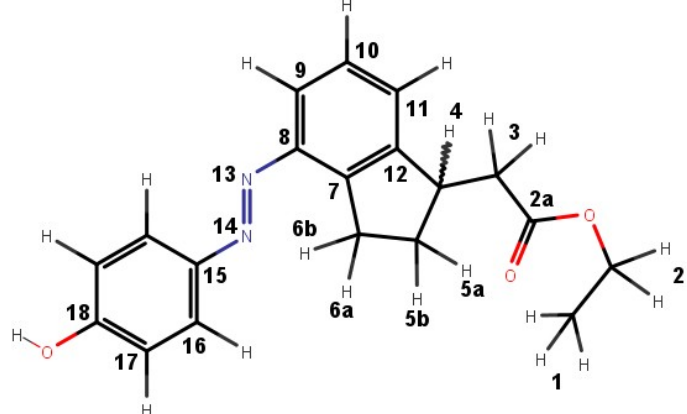

| Atom # | <sup>1</sup> H         | <sup>13</sup> C | <sup>15</sup> N | <sup>1</sup> H | <sup>13</sup> C | <sup>15</sup> N |
|--------|------------------------|-----------------|-----------------|----------------|-----------------|-----------------|
| 1      | 1.32 t                 | 14.3            | -               | 1.32           | 14.3            | -               |
| 2      | 4.24 m                 | 60.6            | -               | 4.23           | 60.6            | -               |
| 2a     | -                      | 172.9           | -               | -              | 172.9           | -               |
| 3      | a: 2.52 m<br>b: 2.90 m | 39.9            | -               | 2.54<br>2.84   | 40.1            | -               |
| 4      | 3.68                   | 41.3            | -               | 3.70           | 41.3            | -               |
| 5      | a: 1.86<br>b: 2.48     | 32.6            | -               | 1.89<br>2.50   | 32.4            | -               |
| 6      | a: 2.95<br>b: 3.02     | 31.2            | -               | 3.24<br>3.42   | 29.5            | -               |
| 7      | -                      | 146.9           | -               | -              | 141.8           | -               |
| 8      | 7.35                   | 124.9           | -               | -              | 148.8           | -               |
| 9      | 7.74                   | 123.0           | -               | 7.58           | 116.5           | -               |
| 10     | -                      | 152.1           | -               | 7.30           | 127.2           | -               |
| 11     | 7.71                   | 116.4           | -               | 7.27           | 125.2           | -               |
| 12     | -                      | 146.8           | -               | -              | 147.8           | -               |
| 13     | -                      | -               | 94.7            | -              | -               | 97.6            |
| 14     | -                      | -               | 98.2            | -              | -               | 104.6           |
| 15     | -                      | 147.1           | -               | -              | 147.5           | -               |
| 16     | 7.86                   | 124.8           | -               | 7.88           | 124.9           | -               |
| 17     | 6.95                   | 115.8           | -               | 6.96           | 115.8           | -               |
| 18     | -                      | 158.3           | -               | -              | 158.3           | -               |

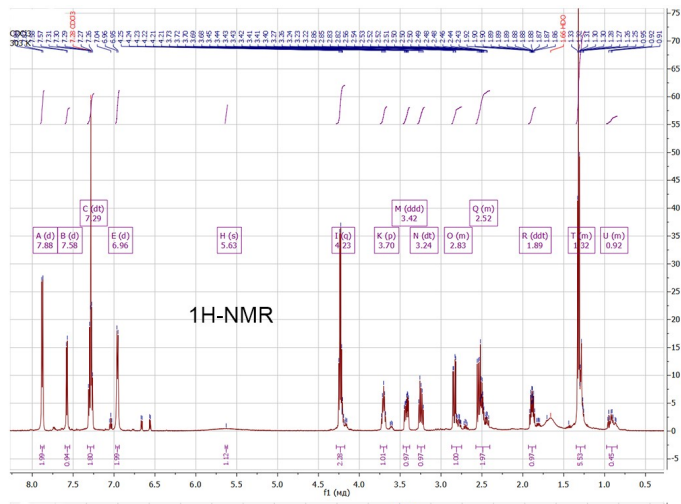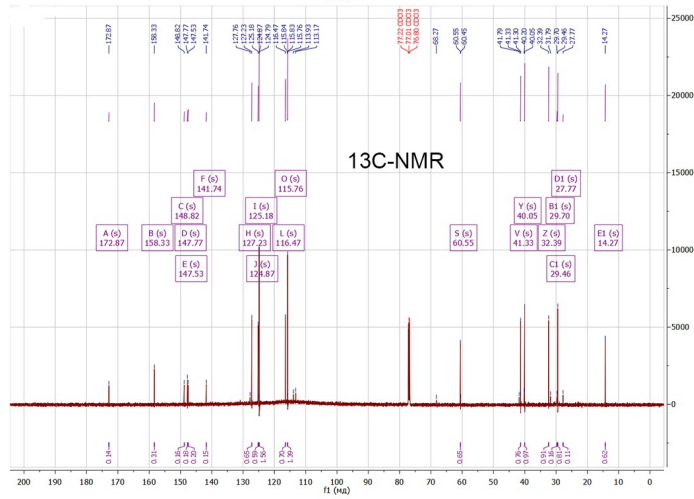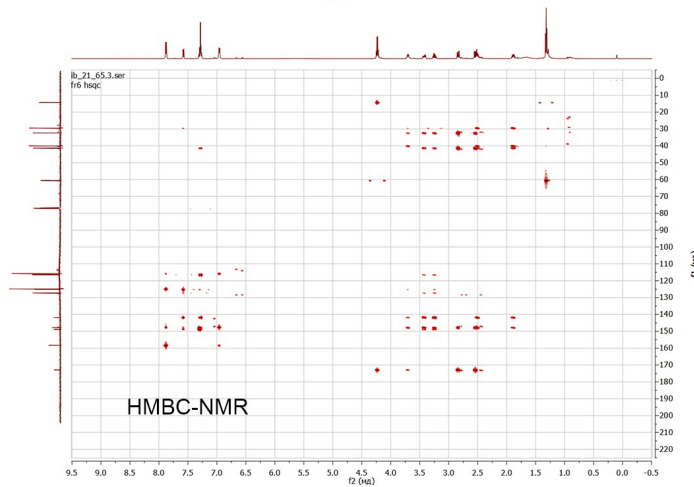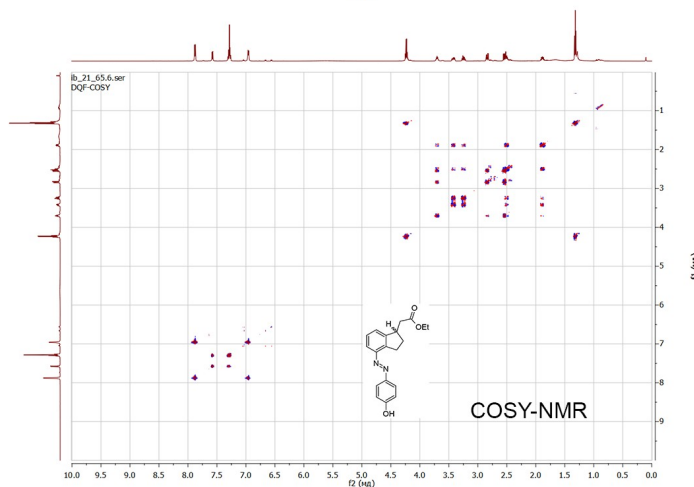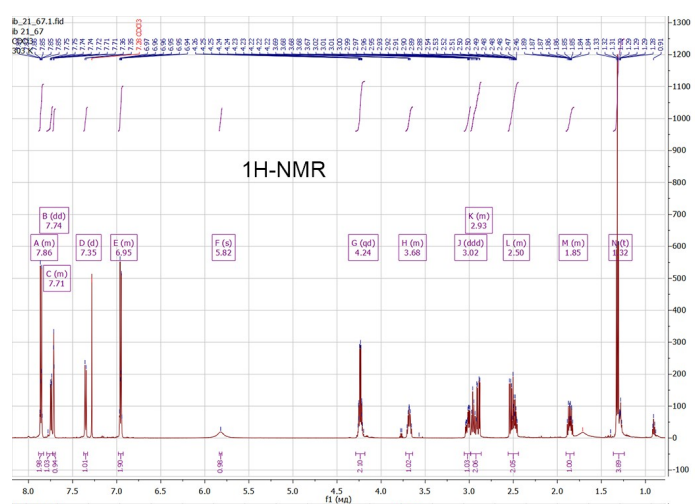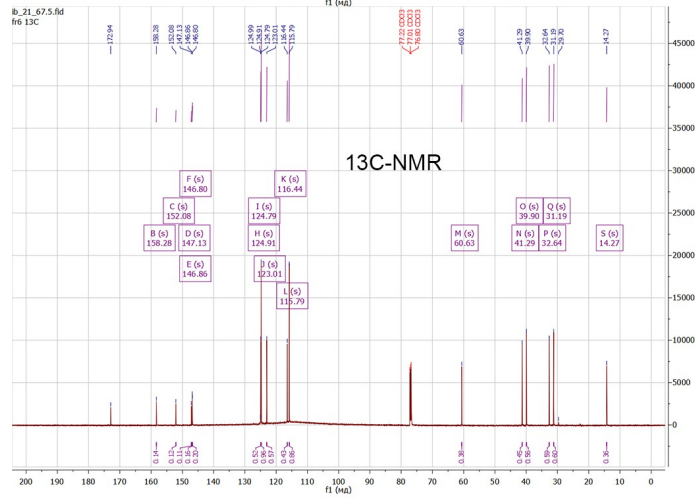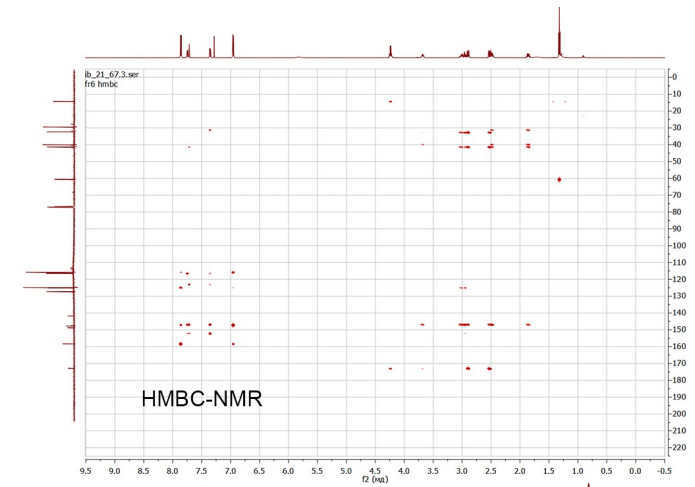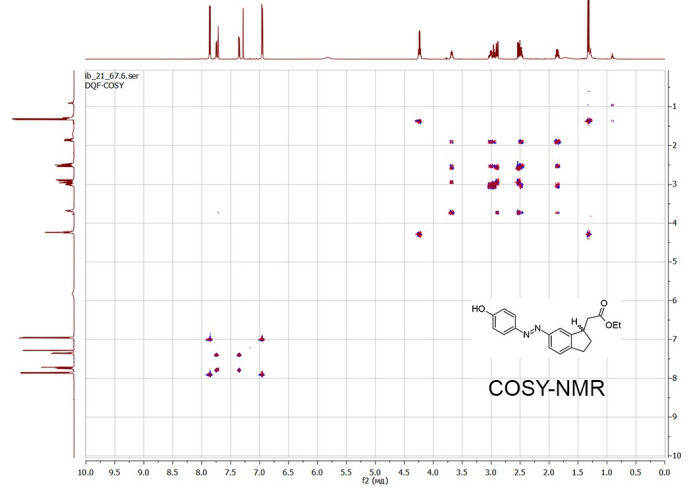

# NMR spectra of intermediate compounds

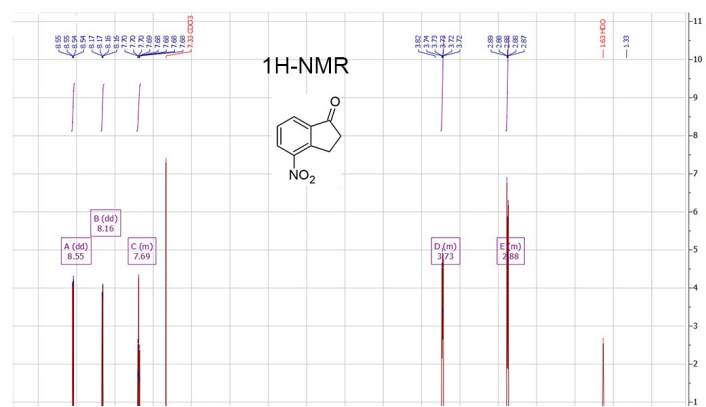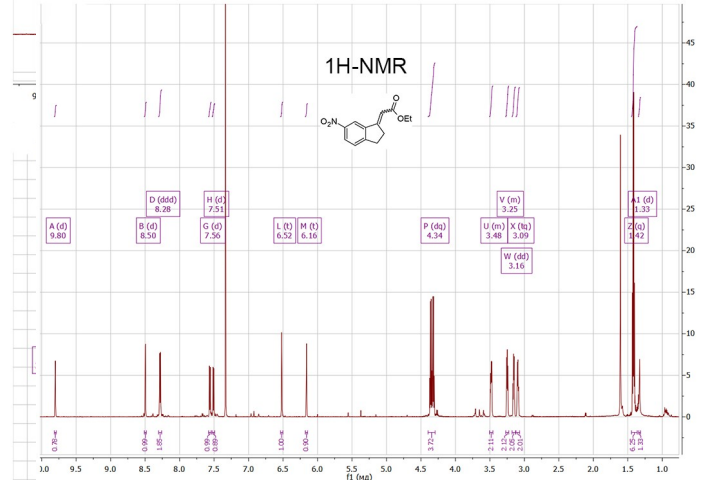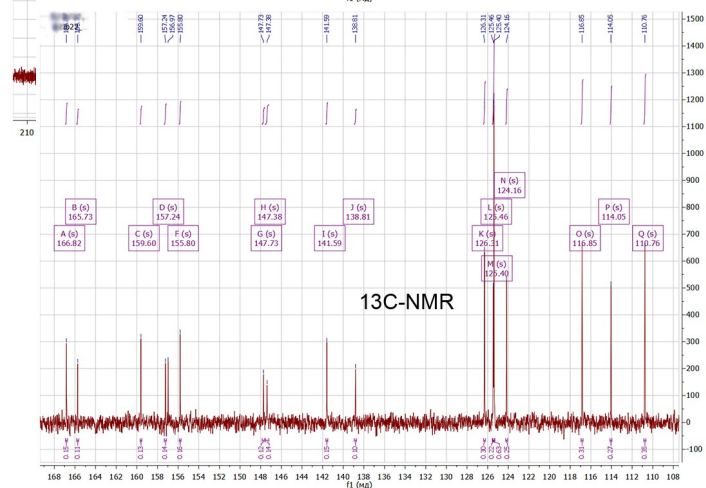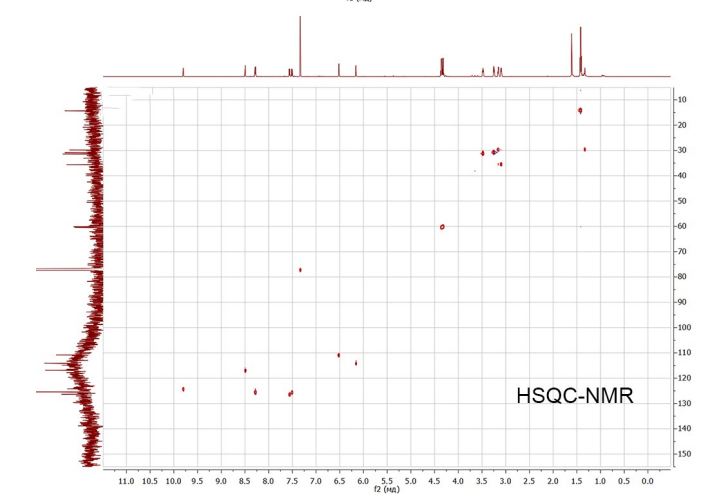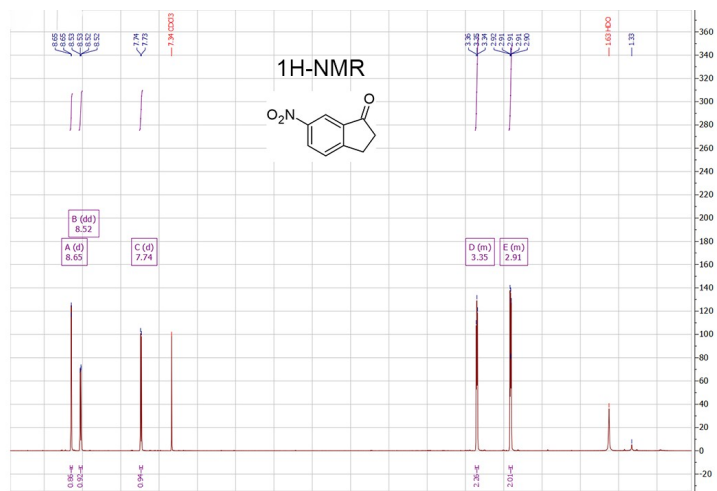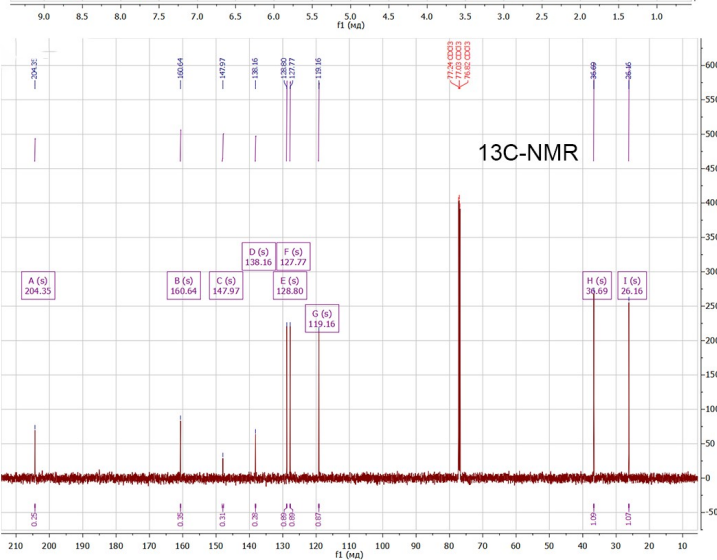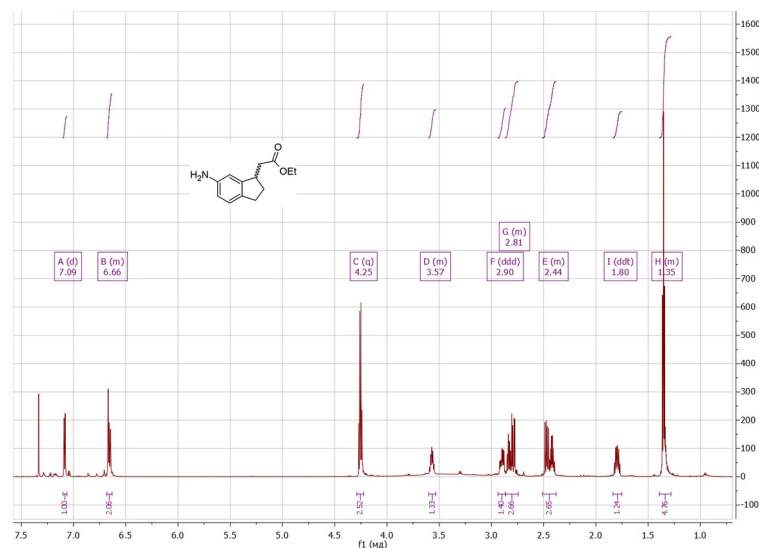

## Section S2. Energy barriers of rotation.

Energy barriers of rotation calculated at BP86 level of theory

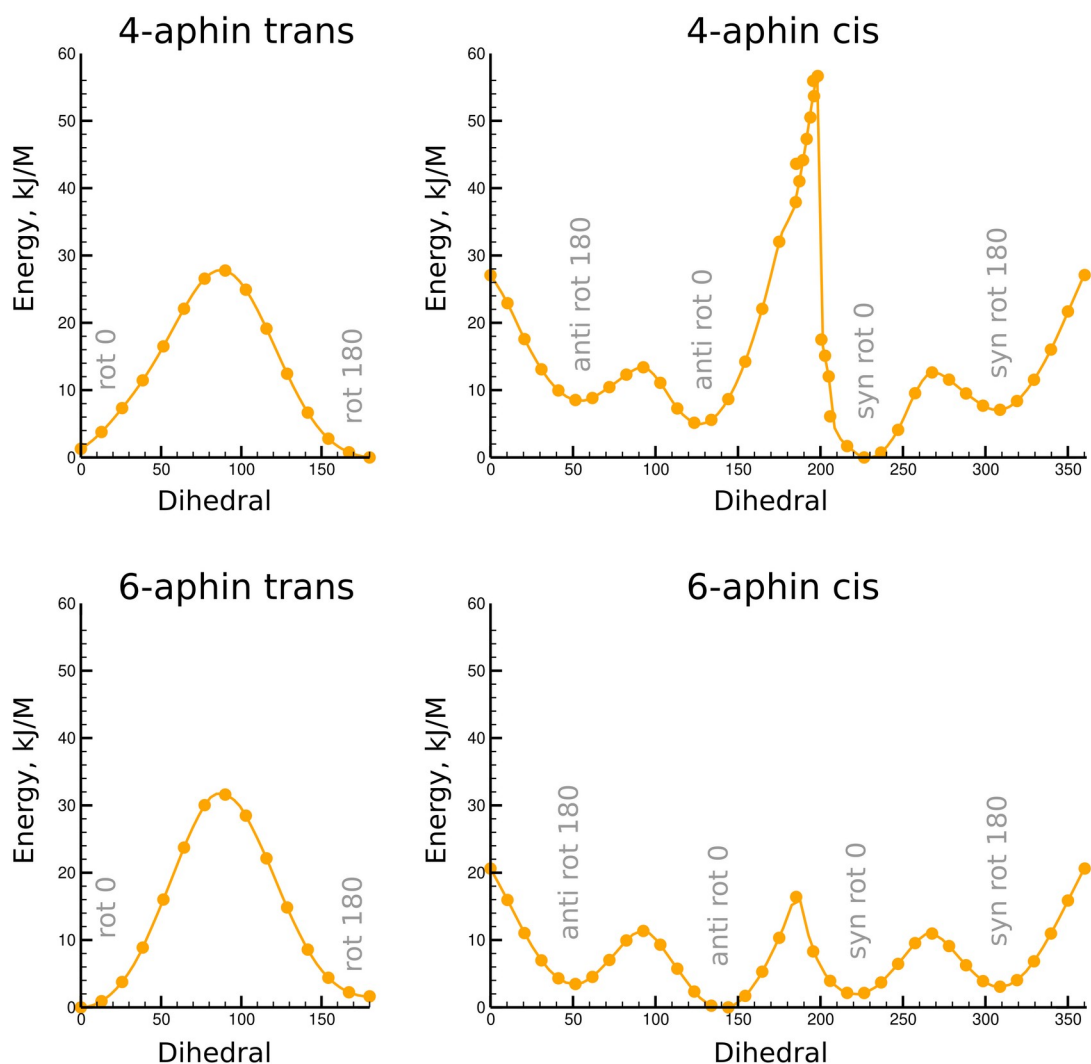

Extremum points of the above calculated at B3LYP level of theory

### 4-aphin

|           |             |             |             |             |             |             |             |
|-----------|-------------|-------------|-------------|-------------|-------------|-------------|-------------|
| Dihedral  | 51,47       | 92,65       | 123,53      | 195,59      | 226,47      | 267,65      | 308,82      |
| E, H      | -1071,09712 | -1071,08504 | -1071,08758 | -1071,06496 | -1071,08847 | -1071,08538 | -1071,08749 |
| E, kJ/mol | 3,54        | 9,01        | 2,31        | 61,72       | 0           | 8,1         | 2,57        |

## 6-aphin

|           |             |             |             |             |             |             |             |
|-----------|-------------|-------------|-------------|-------------|-------------|-------------|-------------|
| Dihedral  | 51,47       | 92,65       | 144,12      | 185,29      | 226,47      | 267,65      | 308,82      |
| E, H      | -1071,08660 | -1071,08359 | -1071,08694 | -1071,08053 | -1071,08677 | -1071,08336 | -1071,08650 |
| E, kJ/mol | 0,9         | 8,81        | 0           | 16,85       | 0,46        | 9,4         | 1,16        |

## B3LYP vs BP86 at stationary point

### 4-aphin

|                   | trans_rot180 | trans_rot0   | cis_anti_rot180 | cis_anti_rot0 | cis_syn_rot180 | cis_syn_rot0 |
|-------------------|--------------|--------------|-----------------|---------------|----------------|--------------|
| E, H (B3LYP)      | -1071,112446 | -1071,112043 | -1071,095227    | -1071,095513  | -1071,095531   | -1071,096916 |
| E, kJ/mol (B3LYP) | 0,0          | 1,1          | 45,2            | 44,5          | 44,4           | 40,8         |
| E, H (BP86)       | -1070,552879 | -1070,552389 | -1070,523108    | -1070,524394  | -1070,523660   | -1070,526357 |
| E, kJ/mol (BP86)  | 0,0          | 1,3          | 78,2            | 74,8          | 76,7           | 69,6         |

### 6-aphin

|                   | trans_rot180 | trans_rot0   | cis_anti_rot180 | cis_anti_rot0 | cis_syn_rot180 | cis_syn_rot0 |
|-------------------|--------------|--------------|-----------------|---------------|----------------|--------------|
| E, H (B3LYP)      | -1071,113069 | -1071,113641 | -1071,094469    | -1071,094707  | -1071,094533   | -1071,095148 |
| E, kJ/mol (B3LYP) | 1,5          | 0,0          | 50,3            | 49,7          | 50,2           | 48,6         |
| E, H (BP86)       | -1070,552181 | -1070,552803 | -1070,521928    | -1070,522286  | -1070,521776   | -1070,523098 |
| E, kJ/mol (BP86)  | 1,6          | 0,0          | 81,1            | 80,1          | 81,5           | 78,0         |



## Section S3.

Frontier molecular orbitals calculated at B3LYP level of theory.

### 4-aphin R trans rot 180

$\Delta E = 3.6058 \text{ eV}$ , 343.8 nm

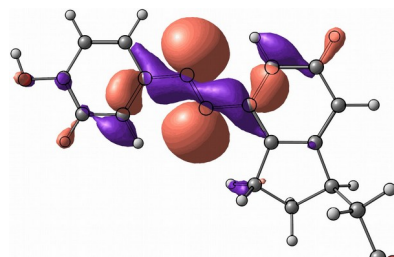

HOMO-1

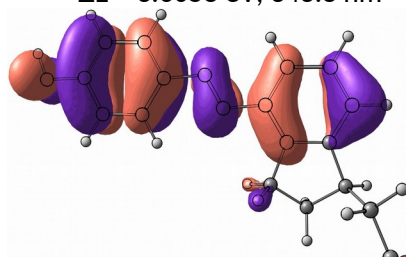

HOMO

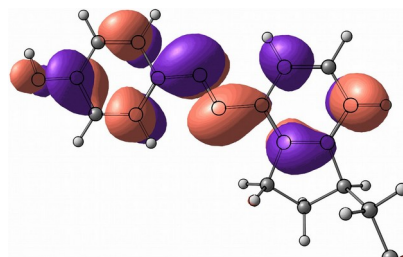

LUMO

### 4-aphin R trans rot 0

$\Delta E = 3.7051 \text{ eV}$ , 334.6 nm

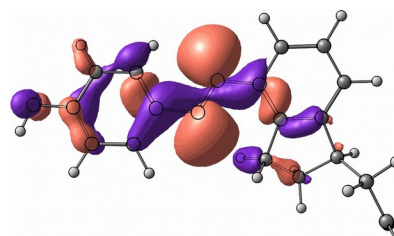

HOMO-1

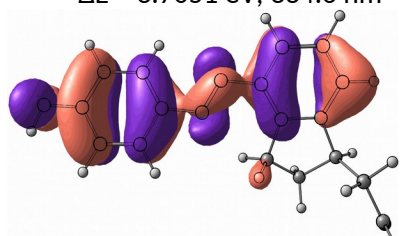

HOMO

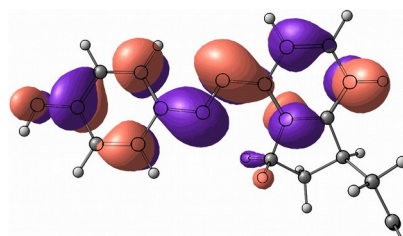

LUMO

### 4-aphin cis syn rot 180

$\Delta E = 3.6989 \text{ eV}$ , 335.2 nm

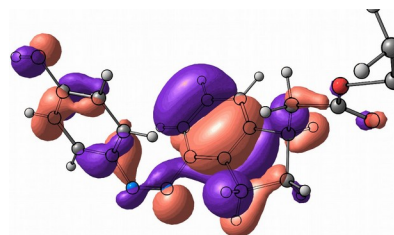

HOMO-1

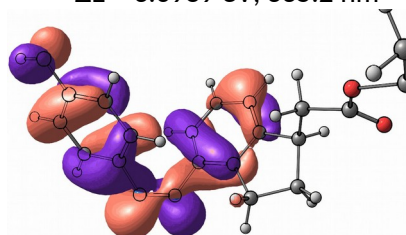

HOMO

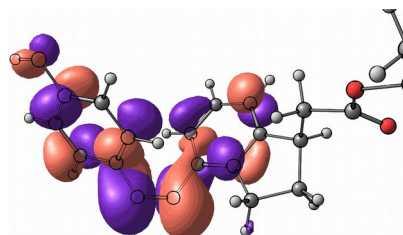

LUMO

### 4-aphin cis syn rot 0

$\Delta E = 3.7187 \text{ eV}$ ; 333.4 nm

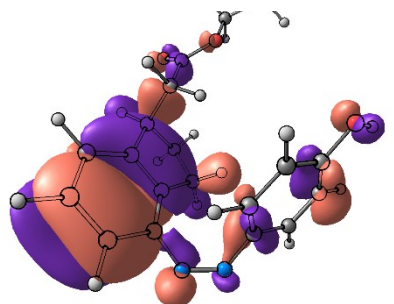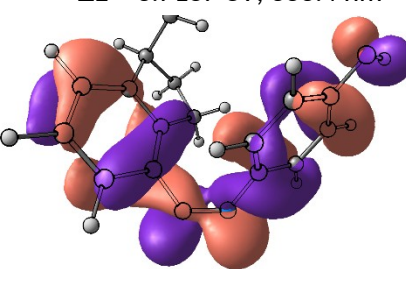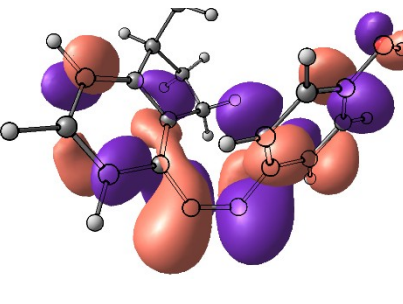



### 4-aphin cis anti rot 180

$\Delta E = 3.6934 \text{ eV}; 335.7 \text{ nm}$

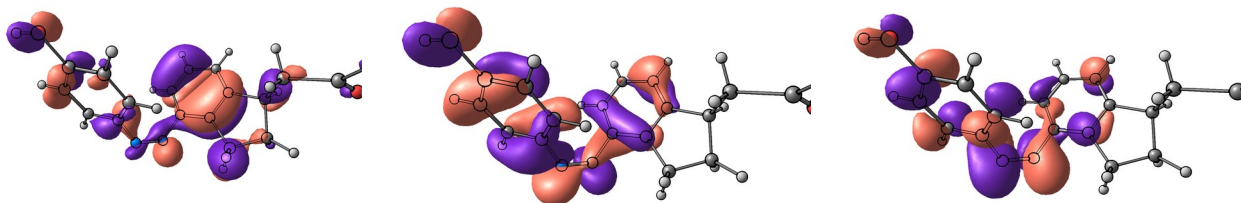

### 4-aphin cis anti rot 0

$\Delta E = 3.7655 \text{ eV}; 329.3 \text{ nm}$

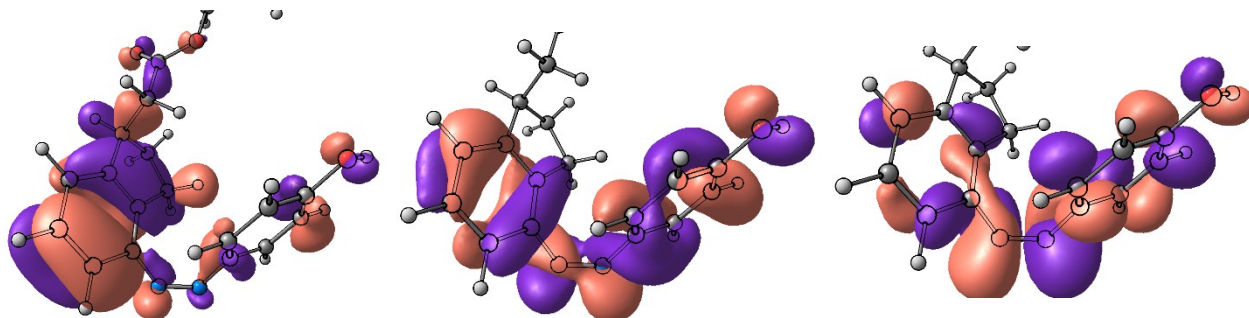

### 6-aphin trans rot 180

$\Delta E = 3.5987 \text{ eV}; 344.5 \text{ nm}$

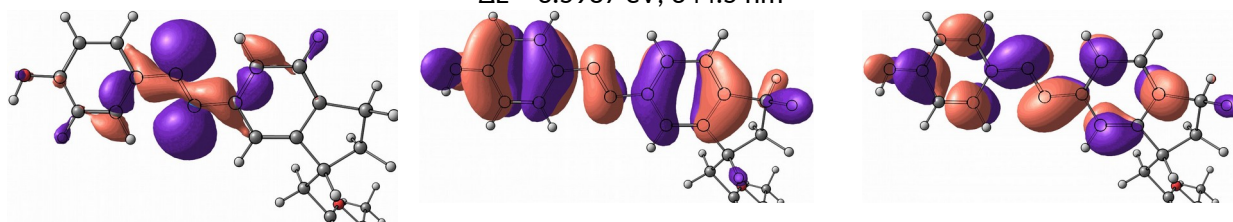

### 6-aphin trans rot 0

$\Delta E = 3.5903 \text{ eV}; 345.3 \text{ nm}$

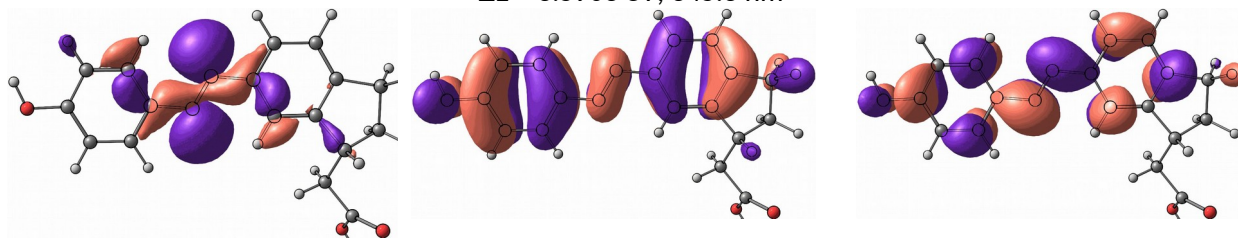

### 6-aphin cis syn rot 180

$\Delta E = 3.6270 \text{ eV}$ ; 341.8 nm

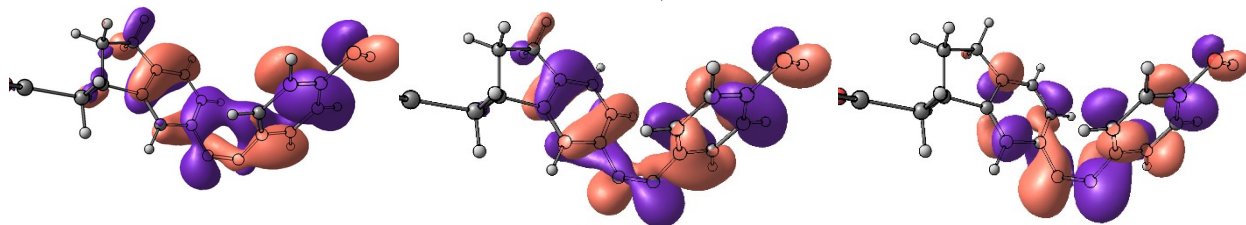

### 6-aphin cis syn rot 0

$\Delta E = 3.6115 \text{ eV}$ ; 343.3 nm

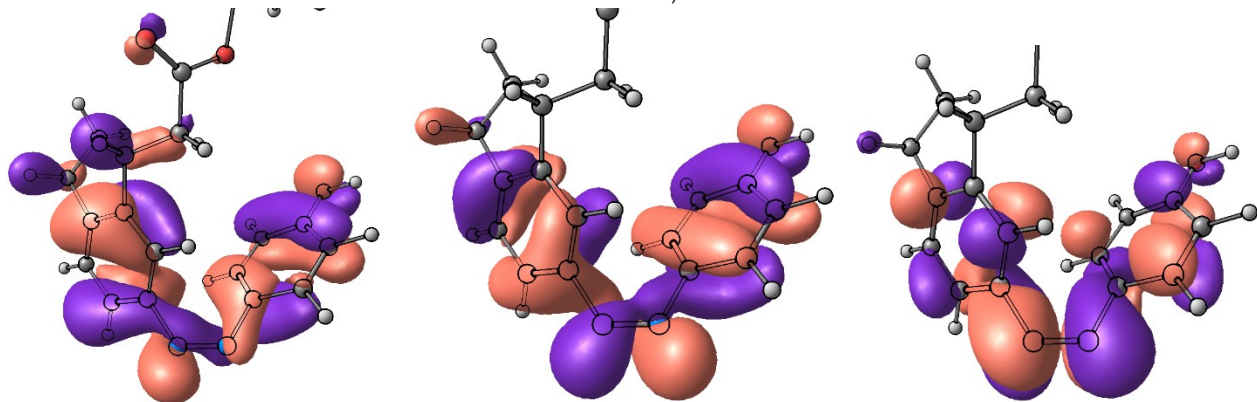

### 6-aphin cis anti rot 180

$\Delta E = 3.6153 \text{ eV}$ ; 342.9 nm

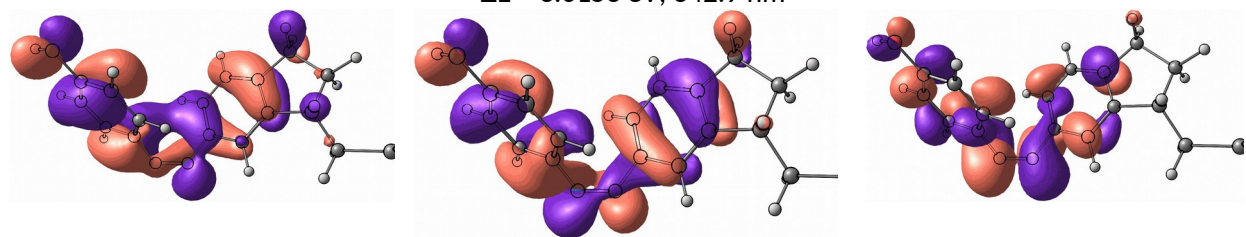

### 6-aphin cis anti rot 0

$\Delta E = 3.6034 \text{ eV}$ ; 344.1 nm

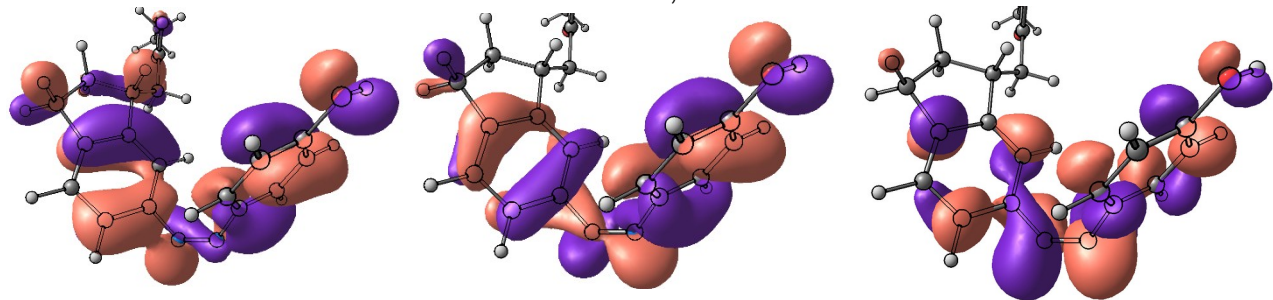

Supplement: s1 [file s1]
